# Supplementary material for: Discovery of Differentially Expressed MicroRNAs in Porcine Ovaries With Smaller and Larger Litter Size
Source: Front Genet. 2022 Feb 9;13:762124. doi: 10.3389/fgene.2022.762124 (PMC8864311; doi:10.3389/fgene.2022.762124)
Supplement: Supplementary file 27 [file Table7.XLSX]

## Sheet: 工作表1
		B	R						B	R
	183-1-1	305	28	0.0918033	0.0918033			NC-1-1	262	13	0.0496183
	183-1-2	323	25	0.0773994	0.0773994			NC-1-2	269	16	0.0594796
	183-1-3	216	24	0.111111	0.111111			NC-1-3	264	15	0.0568182
	183-1-4	359	20	0.0557103	0.0934379						0.0553054
		B	R
	183-2-1	310	45	0.145161				NC-2-1	411	22	0.053528
	183-2-2	311	46	0.14791				NC-2-2	328	10	0.0304878
	183-2-3	321	31	0.0965732				NC-2-3	406	21	0.0517241
	183-2-4	256	25	0.0976562							0.0452466
				0.121825
		B	R						247	15	0.0607287
	183-3-1	321	42	0.130841	0.130841
	183-3-2	299	34	0.113712	0.113712
	183-3-3	322	27	0.0838509	0.0838509
	183-3-4	327	17	0.0519878	0.109468
